# Supplementary material for: Novel 12,12-dimethyl-7,12-dihydrobenzo[a]acridine as a deep-blue emitting chromophore for OLEDs with narrow-band emission and suppressed efficiency roll-off
Source: Royal Society of Chemistry journal article supplement (doi:10.1039/d1tc03898b), 2021-01-01
Supplement: d1tc03898b1.pdf [file d1tc03898b1.pdf]

## **Novel 12,12-Dimethyl-7,12-dihydrobenzo[*a*]acridine as a Deep-Blue Emitting Chromophore for OLEDs with Narrow-Band Emission and Suppressed Efficiency Roll-Off**

Xu Qiu,<sup>2,3‡</sup> Lei Xu,<sup>2‡</sup> Shian Ying,<sup>4</sup> Xiyun Ye,<sup>2</sup> Pei Xu,<sup>2</sup> Bohan Wang,<sup>2</sup>  
Dehua Hu,<sup>1,2\*</sup> Dongge Ma,<sup>2\*</sup> Yuguang Ma<sup>2\*</sup>

*1. School of Chemical Engineering and Light Industry, Guangdong University of Technology, Guangzhou 510006, China. E-mail: msdhhu@scut.edu.cn;*

*2. Institute of Polymer Optoelectronic Materials and Devices, State Key Laboratory of Luminescent Materials and Devices, South China University of Technology, Guangzhou 510640, China.*

*E-mail: msdgm@scut.edu.cn; ygma@scut.edu.cn*

*3. College of Materials Science and Engineering, Shandong University of Science and Technology, Qingdao 266590, China.*

*4. School of Polymer Science and Engineering, Qingdao University of Science and Technology, Qingdao, 266042, China.*

## **Contents**

**SI-1. General information**

**SI-2. Synthesis**

**SI-3. Thermal and electrochemical properties**

**SI-4. Crystal data**

**SI-5. Theoretical calculations**

**SI-6. Photophysical properties**

**SI-7. Electroluminescence properties**

## SI-1. General information

### Measurements

$^1\text{H}$  and  $^{13}\text{C}$  NMR spectra were recorded on a Bruker AC500 (500 MHz) spectrometer at 298 K by utilizing  $\text{CDCl}_3$  as the solvent and tetramethylsilane (TMS) as the internal standard. Mass spectral data were obtained using a Finnigan 4021C gas chromatography (GC)-mass spectrometry (MS) instrument. Elemental analysis was performed on a PerkinElmer 2400. UV-vis absorption spectra were recorded on a Hitachi U-4100 spectrophotometer. Fluorescence measurements were carried out with a Hitachi F-4600 spectrophotometer. The quantum efficiencies of solutions and solid films were carried out with FLS980 Spectrometer with a calibrated integrating sphere. Thermal gravimetric analysis (TGA) was undertaken on a PerkinElmer thermal analysis system at a heating rate of  $10\text{ }^\circ\text{C min}^{-1}$  and a nitrogen flow rate of  $40\text{ mL min}^{-1}$ . Differential scanning calorimetry (DSC) was performed on a NETZSCH (DSC-204) unit at a heating rate of  $10\text{ }^\circ\text{C min}^{-1}$  under nitrogen. Cyclic voltammetry (CV) was performed using a BAS 100W (Bioanalytical Systems), using a glass carbon disk (diameter = 3 mm) as the working electrode, a platinum wire with a porous ceramic wick as the auxiliary electrode, and  $\text{Ag}/\text{Ag}^+$  as the reference electrode standardized by the redox couple ferrocenium/ferrocene. Anhydrous *N,N*-dimethylformamide (DMF) and dichloromethane ( $\text{CH}_2\text{Cl}_2$ ) containing 0.1 M tetrakis(*n*-butyl)-ammonium hexafluorophosphate ( $\text{NBu}_4\text{PF}_6$ ) as the supporting electrolyte were used as solvents under a nitrogen atmosphere. All solutions were purged with a nitrogen stream for 10 min before measurements. The procedure was performed at room temperature, and a

nitrogen atmosphere was maintained over the solution during measurements. A scan rate of  $50 \text{ mV s}^{-1}$  was applied.

### **Theoretical calculation**

Density functional theory (DFT) calculations were performed using Gaussian 09-B01 program Package. The geometry at ground state of the molecule in the gas phase was optimized under the framework of DFT at B3LYP/6-31G (d, p) level and the single point properties at ground state such as molecule orbitals were calculated at the level of M06-2X/def2-TZVP. On the basis of the optimized configuration of the ground state ( $S_0$ ), the high excitation energy levels of singlet and triplet states were evaluated using TD-M062X/6-31+G (d, p). In order to gain further insight into the character of excited states, natural transition orbitals (NTOs) were evaluated for first five singlet and triplet states. The NTOs were generated using the Multiwfn program from the density matrices of TDDFT calculations. The SOCs between different  $S_m$  and  $T_n$  states were calculated with the PySOC program using the linear-response (LR) methods based on the excited-state wave functions obtained from TDDFT calculations above.

### **Device fabrication**

Indium–tin oxide (ITO) coated glass with a sheet resistance of  $15\text{--}20 \text{ } \Omega \text{ cm}^{-2}$  was used as the substrate. Before device fabrication, the ITO glass substrates were cleaned with acetone, detergent, deionized water, and isopropanol, dried in an oven at  $120 \text{ } ^\circ\text{C}$ , and treated with UV-zone for 20 min. After that, the samples were transferred into a deposition system. The devices were fabricated by the multiple source organic molecular beam deposition method in a vacuum at a pressure of  $4 \times 10^{-6}$  mbar.

Evaporation rates of  $0.4 \text{ \AA s}^{-1}$  for the organic materials and  $1\text{--}4 \text{ \AA s}^{-1}$  for the metal electrodes were applied. The thickness of each deposition layer was monitored using a quartz crystal thickness/ratio monitor (STM-100/MF, Sycon). The EL spectra were measured using a PR650 fluorescence spectrophotometer. The current density–voltage–luminance ( $J\text{--}V\text{--}L$ ) characteristics were performed simultaneously by using a computer-controlled source meter (Keithley 2400) equipped with a light intensity meter LS-110. The EQEs were calculated from the luminance, current density and EL spectrum, assuming a Lambertian distribution. All the results of devices were measured in the forward-viewing direction without any out-coupling enhancement techniques.

## SI-2. Synthesis

All reagents and solvents (including super-dry solvents) used for the synthesis and characterization were purchased from Aldrich Chemical Co., or Energy Chemical Co., China and used without further purification. Toluene was distilled over metallic sodium and before use.

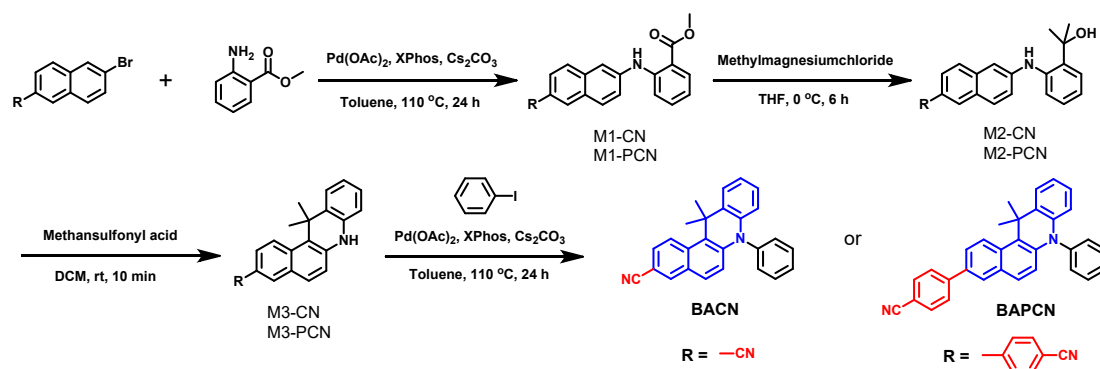

**Scheme S1.** Synthesis route of BACN and BAPCN.

### *Methyl 2-((6-cyanonaphthalen-2-yl)amino)benzoate (M1-CN)*

Commercially available 6-bromo-2-naphthonitrile (5.00 g, 21.54 mmol), methyl 2-

aminobenzoate (3.58 g, 23.70 mmol), Pd(OAc)<sub>2</sub> (0.24 g, 1.08 mmol), XPhos (1.03 g, 2.15 mmol) and CsCO<sub>3</sub> (10.50 g, 32.32 mmol) were dissolved in dry toluene (100 mL), and then the resulted mixture was stirred at a temperature of 110 °C for 24 hours. After cooling down room temperature, the reaction was quenched using water, and then an extraction process was performed thereon three times using ethyl acetate. A separated organic layer was dried using anhydrous magnesium sulfate and concentrated under reduced pressure. The given residue was purified through silica gel column chromatography using dichloromethane/petroleum ether (1/2) as eluent to give the product as a pale yellow solid product (6.50 g, 89%). <sup>1</sup>H NMR (500 MHz, CDCl<sub>3</sub>) δ 9.81 (s, 1H), 8.13 (s, 1H), 8.03 (dd, J = 8.0, 1.6 Hz, 1H), 7.83 (d, J = 8.9 Hz, 1H), 7.74 (d, J = 8.6 Hz, 1H), 7.66 (d, J = 2.1 Hz, 1H), 7.58 – 7.51 (m, 2H), 7.50 – 7.40 (m, 2H), 6.90 (m, 1H), 3.93 (s, 3H). MS (APCI): m/z: 302.2 [M + 1]<sup>+</sup>.

***6-((2-(2-hydroxypropan-2-yl)phenyl)amino)-2-naphthonitrile (M2-CN)***

The M1-CN (4.00 g, 13.25 mmol) was diluted in 100 mL of dry tetrahydrofuran, and then at a temperature of 0 °C, 13.2 mL (39.74 mmol) of methylmagnesiumchloride (3 mol L<sup>-1</sup>) was slowly added dropwise for over 20 min to the solution. After 6 hours of stirring, the reaction was quenched using ammonium chloride, and then an extraction process was performed three times using ethyl acetate. A separated organic layer was dried using anhydrous magnesium sulfate and concentrated under reduced pressure. The given residue was purified through silica gel column chromatography using petroleum ether/ethyl acetate (3/1) as eluent to give the product as a faint yellow solid product (3.24 g, 81%). <sup>1</sup>H NMR (500 MHz, CDCl<sub>3</sub>) δ 8.05 (s, 1H), 7.73 (d, J = 8.9 Hz,

1H), 7.61 (d, J = 8.6 Hz, 1H), 7.54 (dd, J = 8.0, 1.2 Hz, 1H), 7.46 (dd, J = 8.5, 1.6 Hz, 1H), 7.38 (d, J = 2.2 Hz, 1H), 7.36 (dd, J = 3.7, 1.8 Hz, 1H), 7.30 (dt, J = 8.8, 1.9 Hz, 2H), 7.01 (td, J = 7.7, 1.2 Hz, 1H), 4.08 (s, 1H), 3.48 (s, 1H), 1.69 (s, 6H). MS (APCI): m/z: 302.1 [M + 1]<sup>+</sup>.

***12,12-dimethyl-7,12-dihydrobenzo[*a*]acridine-3-carbonitrile (M3-CN)***

The M2-CN (3.00 g, 9.93 mmol) was diluted in 100 mL of dichloromethane, and the 0.64 mL of methanesulfonyl acid was slowly added dropwise in the solution. 10 minutes after the addition, the reaction was quenched using triethylamine. The solution was concentrated under reduced pressure. The given residue was purified through silica gel column chromatography using petroleum ether/dichloromethane (2/3) as eluent to give the product as a faint yellow solid product (2.20 g, 78%). <sup>1</sup>H NMR (500 MHz, CDCl<sub>3</sub>) δ 8.40 (s, 1H), 8.00 (s, 1H), 7.52 (dd, J = 24.4, 8.4 Hz, 2H), 7.39 (s, 1H), 7.21 – 6.11 (m, 4H), 4.03 (s, 1H) 2.13 (s, 6H). MS (APCI): m/z: 284.3 [M + 1]<sup>+</sup>.

***12,12-dimethyl-7-phenyl-7,12-dihydrobenzo[*a*]acridine-3-carbonitrile (BACN)***

The M3-CN (1.50 g, 5.28 mmol), iodobenzene (1.29 g, 6.34 mmol), Pd(OAc)<sub>2</sub> (0.06 g, 0.26 mmol), XPhos (0.25 g, 0.53 mmol) and CsCO<sub>3</sub> (2.57 g, 7.92 mmol) was dissolved in 80 mL dry toluene, and then the resulted mixture was stirred at a temperature of 110 °C for 24 hours. After cooling down room temperature, the reaction was quenched using water, and then an extraction process was performed thereon three times using dichloromethane. A separated organic layer was dried using anhydrous magnesium sulfate and concentrated under reduced pressure. The given residue was purified through silica gel column chromatography using dichloromethane/petroleum ether

(2/3) as eluent to give the product as a pale yellow solid product (1.59 g, 84%). <sup>1</sup>H NMR (500 MHz, CDCl<sub>3</sub>) δ 8.51 (d, J = 9.3 Hz, 1H), 7.97 (d, J = 1.9 Hz, 1H), 7.71 – 7.61 (m, 2H), 7.58 – 7.48 (m, 2H), 7.46 (dd, J = 7.7, 1.7 Hz, 1H), 7.37 (d, J = 9.1 Hz, 1H), 7.30 (dt, J = 8.4, 1.8 Hz, 2H), 6.98 – 6.86 (m, 2H), 6.55 (d, J = 9.2 Hz, 1H), 6.06 (dd, J = 8.1, 1.4 Hz, 1H), 2.27 (s, 6H). <sup>13</sup>C NMR (125 MHz, CDCl<sub>3</sub>) δ 141.31, 140.06, 137.63, 135.27, 134.04, 133.06, 131.38, 131.12, 129.28, 128.66, 128.64, 128.04, 126.98, 126.45, 125.90, 121.54, 120.27, 119.66, 118.65, 114.46, 104.75, 36.49, 34.32. MS (APCI): m/z: 360.4 [M + 1]<sup>+</sup>. Anal. calcd for C<sub>26</sub>H<sub>20</sub>N<sub>2</sub>: C, 86.64; H, 5.59; N, 7.77. Found: C, 86.67; H, 5.60; N, 7.73.

***methyl 2-(((6-(4-cyanophenyl)naphthalen-2-yl)amino)benzoate (M1-PCN)***

4-(6-bromonaphthalen-2-yl)benzotrile (2.50 g, 8.12 mmol), methyl 2-aminobenzoate (1.47 g, 9.74 mmol), Pd(OAc)<sub>2</sub> (0.09 g, 0.41 mmol), XPhos (0.39 g, 0.81 mmol) and CsCO<sub>3</sub> (3.96 g, 12.18 mmol) were dissolved in dry toluene (50 mL), and then the resulted mixture was stirred at a temperature of 110 °C for 24 hours. After cooling down room temperature, the reaction was quenched using water, and then an extraction process was performed thereon three times using ethyl acetate. A separated organic layer was dried using anhydrous magnesium sulfate and concentrated under reduced pressure. The given residue was purified through silica gel column chromatography using dichloromethane/petroleum ether (3/2) as eluent to give the product as a pale yellow solid product (2.67 g, 87%). <sup>1</sup>H NMR (500 MHz, CDCl<sub>3</sub>) δ 9.73 (s, 1H), 8.05 – 7.98 (m, 2H), 7.86 (d, J = 8.7 Hz, 1H), 7.84 – 7.77 (m, 3H), 7.77 – 7.72 (m, 2H), 7.67 (dd, J = 8.5, 2.0 Hz, 2H), 7.44 (td, J = 9.1, 8.6, 1.7 Hz, 2H), 7.38 (ddd, J = 8.5, 7.0, 1.7



Hz, 1H), 6.82 (ddd, J = 8.2, 7.0, 1.2 Hz, 1H), 3.93 (s, 3H). MS (APCI): m/z: 378.3 [M + 1]<sup>+</sup>.

***4-(6-((2-(2-hydroxypropan-2-yl)phenyl)amino)naphthalen-2-yl)benzotrile (M2-PCN)***

The M1-PCN (2.00 g, 5.29 mmol) was diluted in 60 mL of dry tetrahydrofuran, and then at a temperature of 0 °C, 5.29 mL (15.87 mmol) of methylmagnesiumchloride (3 mol L<sup>-1</sup>) was slowly added dropwise for over 20 min to the solution. After 6 hours of stirring, the reaction was quenched using ammonium chloride, and then an extraction process was performed three times using ethyl acetate. A separated organic layer was dried using anhydrous magnesium sulfate and concentrated under reduced pressure. The given residue was purified through silica gel column chromatography using dichloromethane/petroleum ether (4/1) as eluent to give the product as a faint yellow solid product (1.58 g, 79%). <sup>1</sup>H NMR (500 MHz, CDCl<sub>3</sub>) δ 7.94 (d, J = 1.9 Hz, 1H), 7.86 – 7.76 (m, 4H), 7.76 – 7.68 (m, 3H), 7.67 – 7.59 (m, 1H), 7.53 (dd, J = 8.1, 1.3 Hz, 1H), 7.45 (d, J = 2.2 Hz, 1H), 7.36 – 7.27 (m, 2H), 6.97 (td, J = 7.6, 1.3 Hz, 1H), 4.02 (s, 1H), 3.47 (s, 1H), 1.71 (s, 6H). MS (APCI): m/z: 378.2 [M + 1]<sup>+</sup>.

***4-(12,12-dimethyl-7,12-dihydrobenzo[a]acridin-3-yl)benzotrile (M3-PCN)***

The M2-PCN (2.00 g, 5.29 mmol) was diluted in 80 mL of dichloromethane, and the 0.34 mL of methansulfonyl acid was slowly added dropwise in the solution. 10 minutes after the addition, the reaction was quenched using triethylamine. The solution was concentrated under reduced pressure. The given residue was purified through silica gel column chromatography using petroleum ether/dichloromethane (1/1) as eluent to give

the product as a faint yellow solid product (1.43 g, 75%). <sup>1</sup>H NMR (500 MHz, CDCl<sub>3</sub>) δ 8.47 (s, 2H), 8.02 – 7.53 (m, 7H), 7.41 (s, 1H), 7.07 (s, 1H), 6.80 (s, 2H), 4.02 (s, 1H), 2.19 (s, 6H). MS (APCI): m/z: 360.4 [M + 1]<sup>+</sup>.

***4-(12,12-dimethyl-7-phenyl-7,12-dihydrobenzo[a]acridin-3-yl)benzotrile (BAPCN)***

The M3-PCN (1.6 g, 4.44 mmol), iodobenzene (1.09 g, 5.33 mmol), Pd(OAc)<sub>2</sub> (0.05 g, 0.22 mmol), XPhos (0.21 g, 0.44 mmol) and CsCO<sub>3</sub> (2.17 g, 6.67 mmol) was dissolved in 80 mL dry toluene, and then the resulted mixture was stirred at a temperature of 110 °C for 24 hours. After cooling down room temperature, the reaction was quenched using water, and then an extraction process was performed thereon three times using dichloromethane. A separated organic layer was dried using anhydrous magnesium sulfate and concentrated under reduced pressure. The given residue was purified through silica gel column chromatography using dichloromethane/petroleum ether (1/1) as eluent to give the product as a pale yellow solid product (1.57 g, 81%). <sup>1</sup>H NMR (500 MHz, CDCl<sub>3</sub>) δ 8.58 (d, J = 9.3 Hz, 1H), 7.86 (d, J = 2.2 Hz, 1H), 7.82 – 7.76 (m, 2H), 7.76 – 7.70 (m, 2H), 7.69 – 7.61 (m, 3H), 7.53 (tt, J = 7.1, 1.2 Hz, 1H), 7.50 – 7.45 (m, 1H), 7.43 (d, J = 9.1 Hz, 1H), 7.33 (dt, J = 8.3, 1.7 Hz, 2H), 6.95 – 6.86 (m, 2H), 6.51 (d, J = 9.1 Hz, 1H), 6.11 – 6.04 (m, 1H), 2.32 (s, 6H). <sup>13</sup>C NMR (125 MHz, CDCl<sub>3</sub>) δ 145.14, 141.84, 138.30, 138.11, 133.04, 132.62, 132.14, 132.05, 131.38, 131.24, 130.55, 128.69, 128.38, 128.07, 127.81, 127.28, 127.14, 126.31, 124.04, 120.94, 120.03, 119.12, 118.02, 114.21, 110.34, 36.61, 34.32. MS (APCI): m/z: 436.3 [M + 1]<sup>+</sup>. Anal. calcd for C<sub>32</sub>H<sub>24</sub>N<sub>2</sub>: C, 88.04; H, 5.54; N, 6.42. Found: C, 88.01; H, 5.58; N, 6.41.

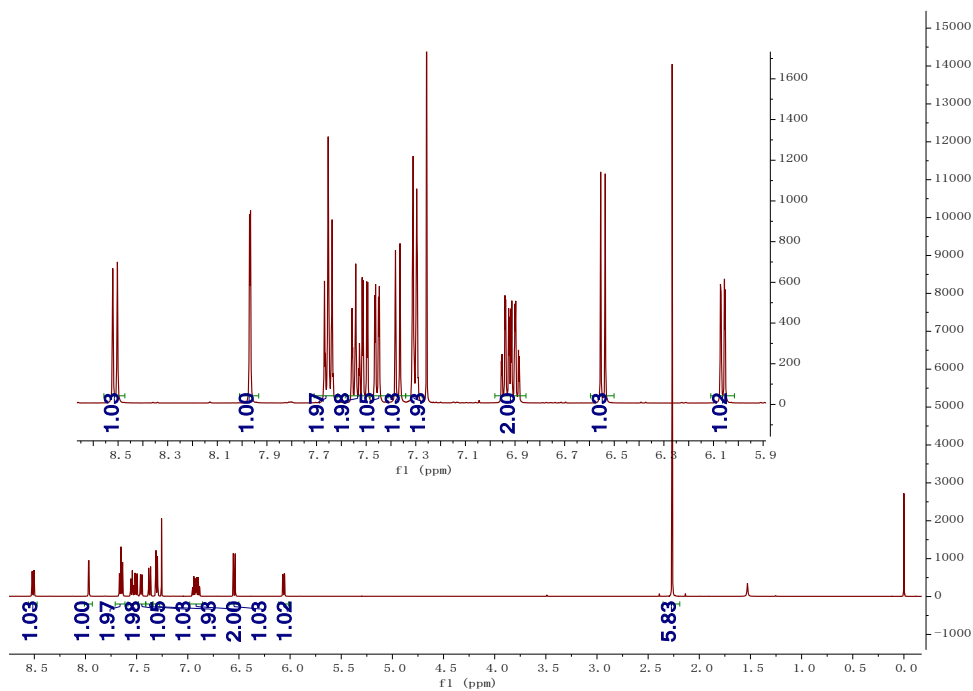

Fig. S1.  $^1\text{H}$  NMR spectrum of BACN in  $\text{CDCl}_3$ .

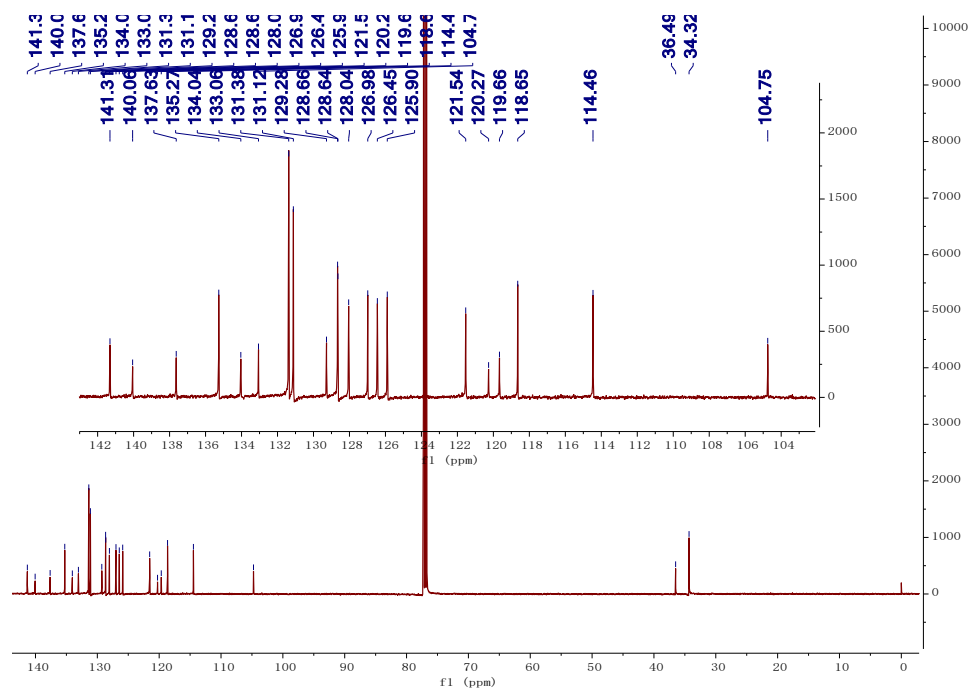

Fig. S2.  $^{13}\text{C}$  NMR spectrum of BACN in  $\text{CDCl}_3$ .

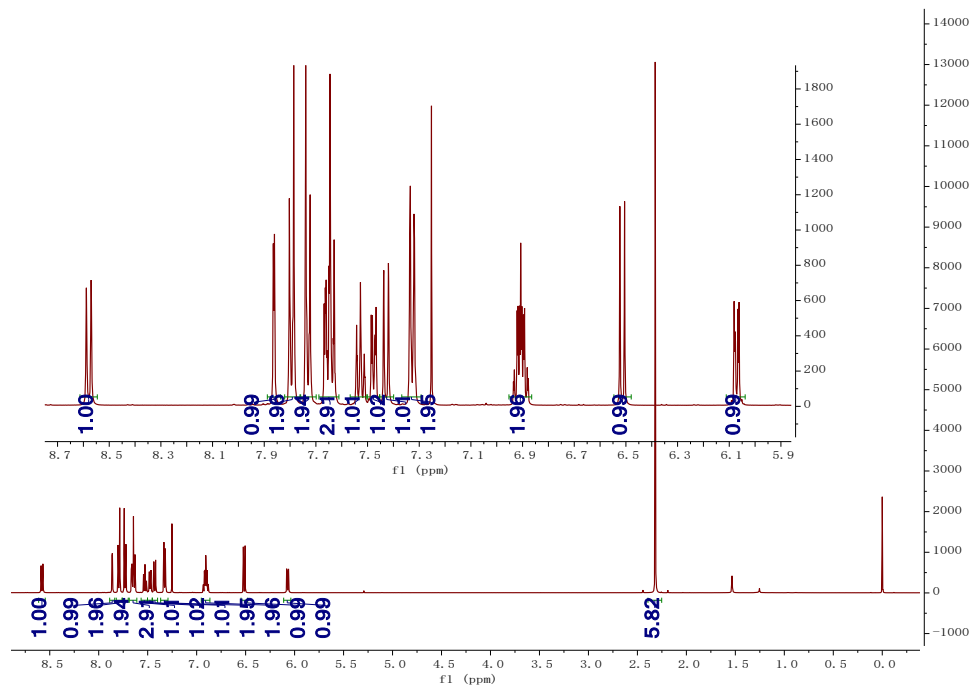

Fig. S3.  $^1\text{H}$  NMR spectrum of BAPCN in  $\text{CDCl}_3$ .

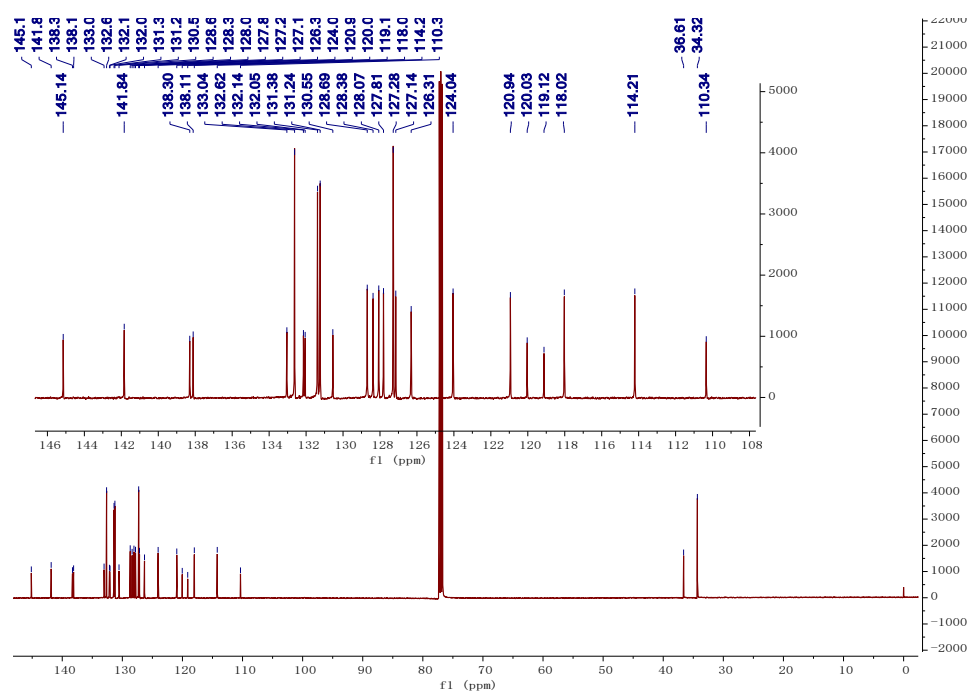

Fig. S4.  $^{13}\text{C}$  NMR spectrum of BAPCN in  $\text{CDCl}_3$ .

### SI-3. Thermal and electrochemical properties

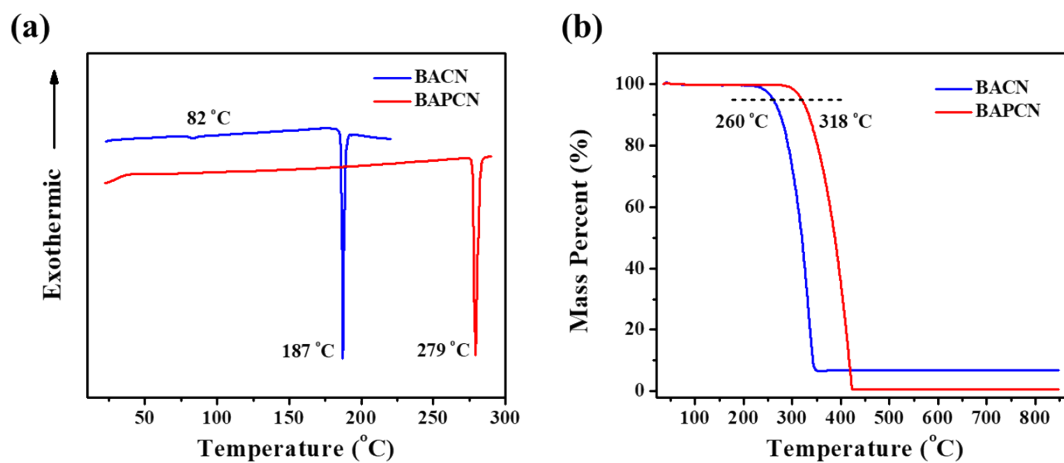

**Fig. S5.** (a) DSC and (b) TGA curves of BACN and BAPCN.

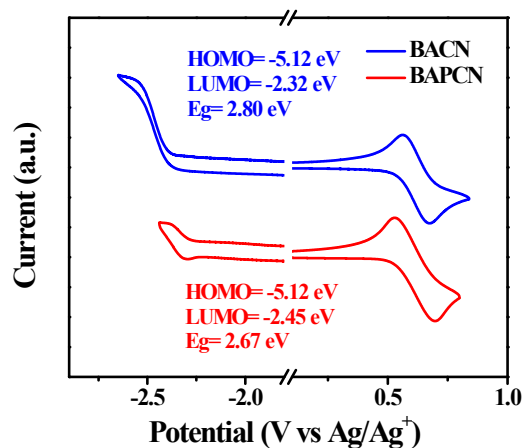

**Fig. S6.** Cyclic voltammety curves of BACN and BAPCN.

The electrochemical properties of BACN and BAPCN were obtained from the cyclic voltammety (CV) measurements. From the onset of the oxidation potential, the highest occupied molecular orbitals (HOMO) energy is estimated to be -5.12 eV for both BACN and BAPCN. Moreover, the lowest unoccupied molecular orbitals (LUMO) energy could be obtained from the onset of reduction potentials. The LUMOs are -2.32 eV and -2.45 eV for BACN and BAPCN, respectively. Therefore, the energy gaps ( $E_g$ s) of BACN and BAPCN could be calculated to be 2.80 and 2.67 eV, respectively. The detailed parameters in the Table 1 in main article.

## SI-4. Crystal data

**Table S1.** Crystal data and structural refinement for BACN and BAPCN crystals.

| Compound name                                                                 | BACN                                                             | BAPCN                                                          |
|-------------------------------------------------------------------------------|------------------------------------------------------------------|----------------------------------------------------------------|
| Compound reference                                                            | clear light yellow crystal                                       | yellow crystal                                                 |
| Chemical formula                                                              | C <sub>26</sub> H <sub>20</sub> N <sub>2</sub>                   | C <sub>32</sub> H <sub>24</sub> N <sub>2</sub>                 |
| Formula weight                                                                | 360.44                                                           | 436.53                                                         |
| Crystal system                                                                | Monoclinic                                                       | Monoclinic                                                     |
| <i>a</i> /Å                                                                   | 15.8871(4)                                                       | 33.6072(7)                                                     |
| <i>b</i> / Å                                                                  | 8.51966(11)                                                      | 7.93808(16)                                                    |
| <i>c</i> / Å                                                                  | 16.1057(4)                                                       | 16.8859(3)                                                     |
| $\alpha$ /°                                                                   | 90                                                               | 90                                                             |
| $\beta$ /°                                                                    | 119.369(3)                                                       | 101.9277(19)                                                   |
| $\gamma$ /°                                                                   | 90                                                               | 90                                                             |
| Unit cell volume/ Å <sup>3</sup>                                              | 1899.78(8)                                                       | 4407.48(15)                                                    |
| Temperature/K                                                                 | 100.1(9)                                                         | 100.0(6)                                                       |
| Space group                                                                   | P-2                                                              | C-2                                                            |
| Z                                                                             | 4                                                                | 8                                                              |
| Density (calculated) /g cm <sup>-3</sup>                                      | 1.260                                                            | 1.316                                                          |
| F(000)                                                                        | 760                                                              | 1840                                                           |
| Theta range for data collection                                               | 3.201 to 67.073 deg.                                             | 4.1890 to 73.2830 deg.                                         |
| Index ranges                                                                  | -18<= <i>h</i> <=18, -10<= <i>k</i> <=10,<br>-18<= <i>l</i> <=19 | -37<= <i>h</i> <=40, -7<= <i>k</i> <=9,<br>-15<= <i>l</i> <=20 |
| Reflections measured                                                          | 3390                                                             | 3948                                                           |
| Independent reflections                                                       | 3024                                                             | 3550                                                           |
| <i>R</i> <sub>int</sub>                                                       | 0.0289                                                           | 0.0199                                                         |
| Absorption correction                                                         | multi-scan                                                       | multi-scan                                                     |
| Refinement method                                                             | none                                                             | none                                                           |
| Data / restraints / parameters                                                | 3390 / 0 / 255                                                   | 3948 / 0 / 309                                                 |
| Goodness-of-fit on <i>F</i> <sup>2</sup>                                      | 1.045                                                            | 1.039                                                          |
| Final <i>R</i> <sub>I</sub> values ( <i>I</i> > 2σ( <i>I</i> ))               | 0.0341                                                           | 0.0338                                                         |
| Final <i>wR</i> ( <i>F</i> <sup>2</sup> ) values ( <i>I</i> > 2σ( <i>I</i> )) | 0.0909                                                           | 0.0914                                                         |
| Final <i>R</i> <sub>I</sub> values (all data)                                 | 0.0380                                                           | 0.0375                                                         |
| Final <i>wR</i> ( <i>F</i> <sup>2</sup> ) values (all data)                   | 0.0939                                                           | 0.0940                                                         |
| CCDC number                                                                   | 2042850                                                          | 2042752                                                        |

## SI-5. Theoretical calculations

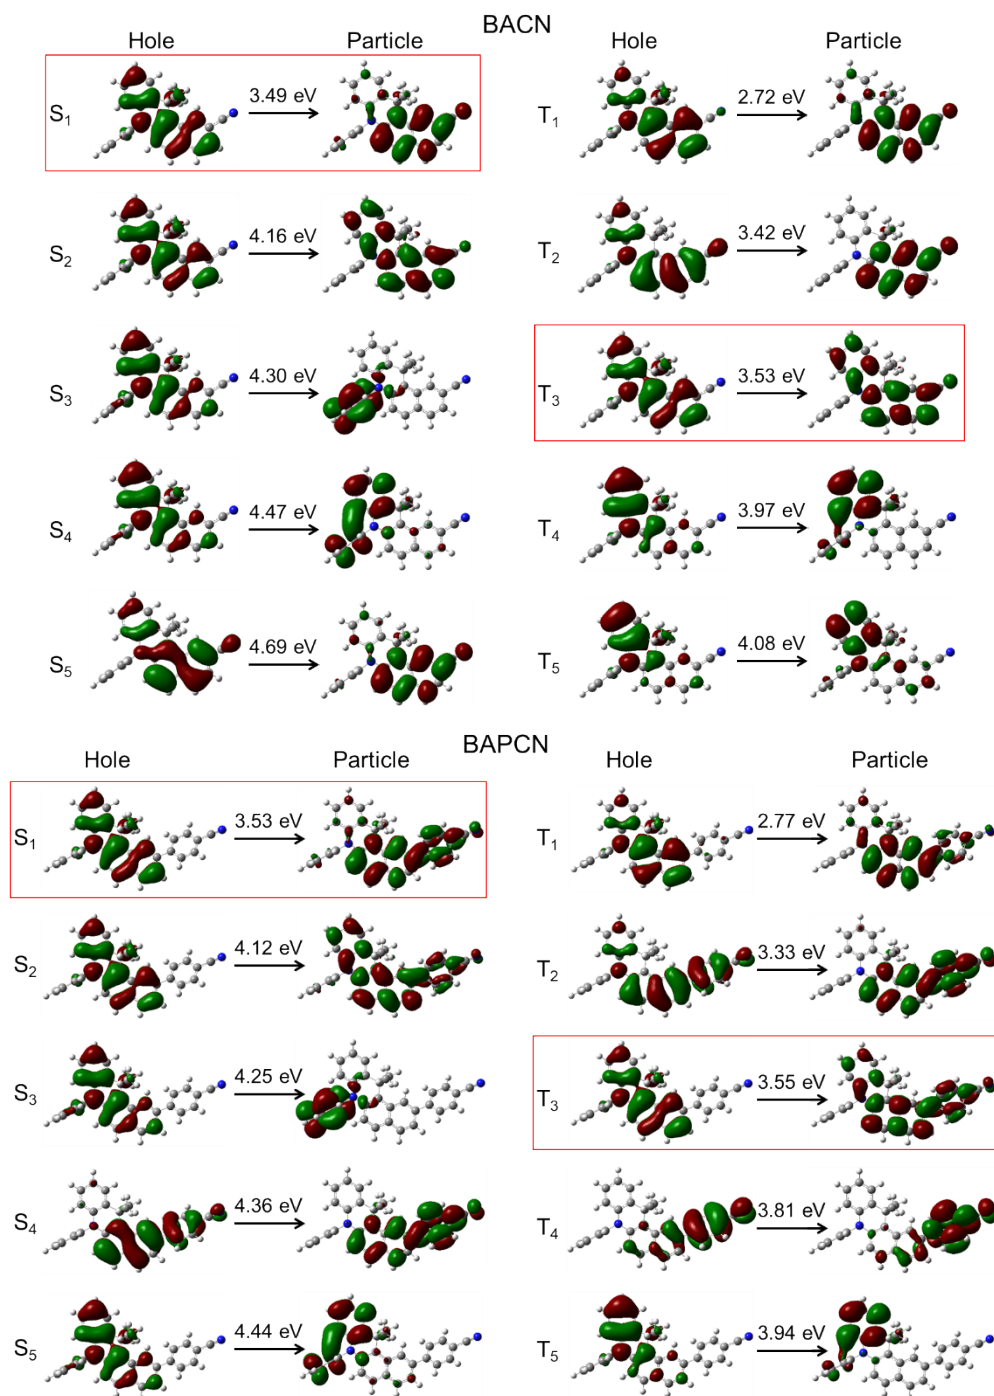

**Fig. S7.** The energy level (on the arrow) and the nature transition orbitals of the first five singlet and triplet states of BACN and BAPCN.

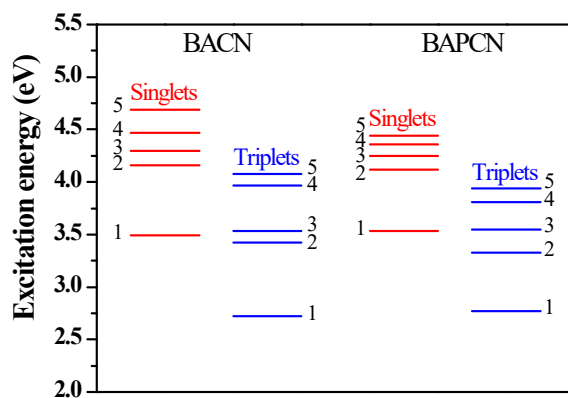

**Fig. S8.** Energy levels of the first five singlet and triplet excited states in BACN and BAPCN.

## SI-6. Photophysical properties

**Table S2.** Detailed absorption and emission peak positions of BACN and BAPCN in different solvents.

| Solvents        | $n$   | $f(\varepsilon, n)$ | BACN                           |                               |                                      | BAPCN                          |                               |                                      |
|-----------------|-------|---------------------|--------------------------------|-------------------------------|--------------------------------------|--------------------------------|-------------------------------|--------------------------------------|
|                 |       |                     | $\lambda_{\text{abs}}$<br>[nm] | $\lambda_{\text{em}}$<br>[nm] | $\nu_a-\nu_f$<br>[cm <sup>-1</sup> ] | $\lambda_{\text{abs}}$<br>[nm] | $\lambda_{\text{em}}$<br>[nm] | $\nu_a-\nu_f$<br>[cm <sup>-1</sup> ] |
| Hexane          | 1.375 | 0.0012              | 402                            | 410                           | 485                                  | 401                            | 422                           | 1241                                 |
| Triethylamine   | 1.401 | 0.048               | 402                            | 418                           | 952                                  | 401                            | 433                           | 1843                                 |
| Butyl ether     | 1.399 | 0.096               | 402                            | 424                           | 1291                                 | 401                            | 440                           | 2210                                 |
| Isopropyl ether | 1.368 | 0.145               | 402                            | 426                           | 1401                                 | 401                            | 446                           | 2516                                 |
| Ethyl ether     | 1.352 | 0.167               | 402                            | 430                           | 1620                                 | 401                            | 451                           | 2765                                 |
| Ethyl acetate   | 1.372 | 0.200               | 402                            | 440                           | 2148                                 | 401                            | 468                           | 3570                                 |
| Tetrahydrofuran | 1.407 | 0.210               | 402                            | 441                           | 2200                                 | 401                            | 474                           | 3841                                 |
| Dichloromethane | 1.424 | 0.217               | 402                            | 449                           | 2604                                 | 401                            | 489                           | 4488                                 |
| Acetone         | 1.359 | 0.284               | 402                            | 453                           | 2801                                 | 401                            | 496                           | 4776                                 |
| Acetonitrile    | 1.344 | 0.305               | 402                            | 462                           | 3231                                 | 401                            | 510                           | 5330                                 |

$\lambda_{\text{abs}}$  = absorption maximum,  $\lambda_{\text{em}}$  = emission maximum,  $\nu_a-\nu_f$  = Stokes shift.



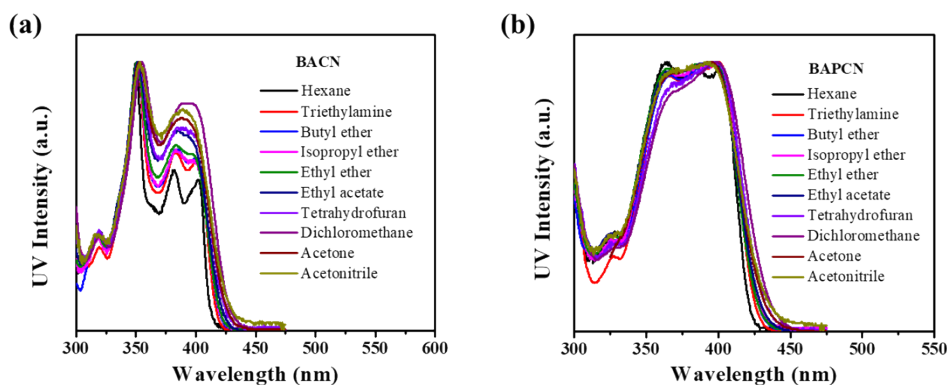

**Fig. S9.** The UV-vis absorption spectra of BACN and BACPN in ten different solvents with increasing polarity.

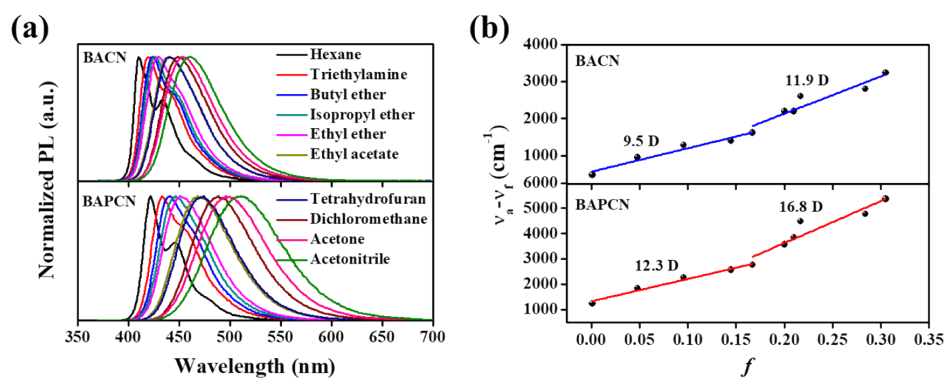

**Fig. S10.** (a) Normalized PL spectra of BACN and BACPN measured in different solvents with increasing polarity. (b) Linear correlation of orientational polarization ( $f$ ) of solvent media with the Stokes shift ( $\nu_a - \nu_f$ ; a: absorbed light; f: fluorescence) for BACN and BACPN.

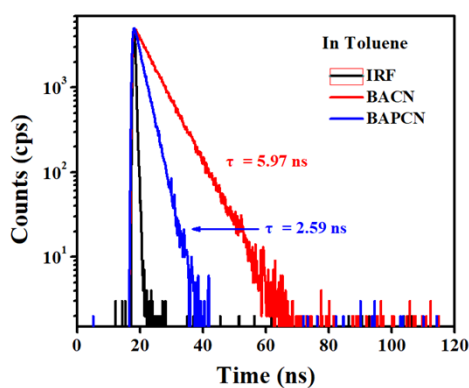

**Fig. S11.** Transient fluorescence decay spectra of BACN and BACPN in dilute toluene ( $10^{-5} \text{ mol L}^{-1}$ ) at 300 K.

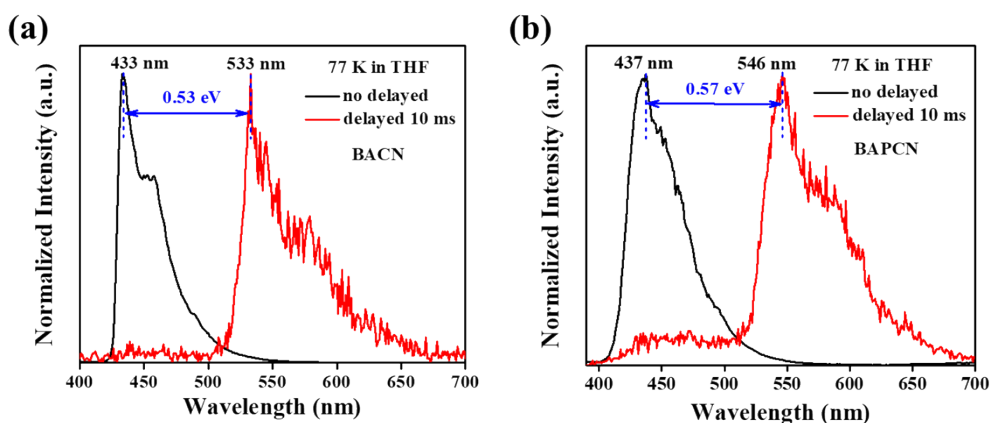

**Fig. S12.** The emission spectra at 77 K with and without a delay time of 10 ms of BACN and BAPCN in THF solutions.

The devices based on BACN and BAPCN all exhibited higher maximum EQE than the theoretical upper limit (5%) of traditional fluorescent materials (Table 2), and the radiative exciton utilization efficiency (EUE) broke the limit of 25% singlet excitons of spin statistics rule. Since the energy gaps between  $S_1$  and  $T_1$  of BACN and BAPCN are larger than 0.5 eV (Fig. S12), and the time-resolved fluorescence revealed mono-exponential decay with nano-scale lifetime (Fig. S11), the reverse intersystem crossing (RISC) from  $T_1$  to  $S_1$  seems cannot occur. Through the time-dependent DFT calculation (Fig. S8), we speculate that the breakthrough of EQE could ascribed to the RISC from upper excited states (*e.g.*,  $T_2 \rightarrow S_1$ ) as we reported before.<sup>1-5</sup>

## SI-7. Electroluminescence properties

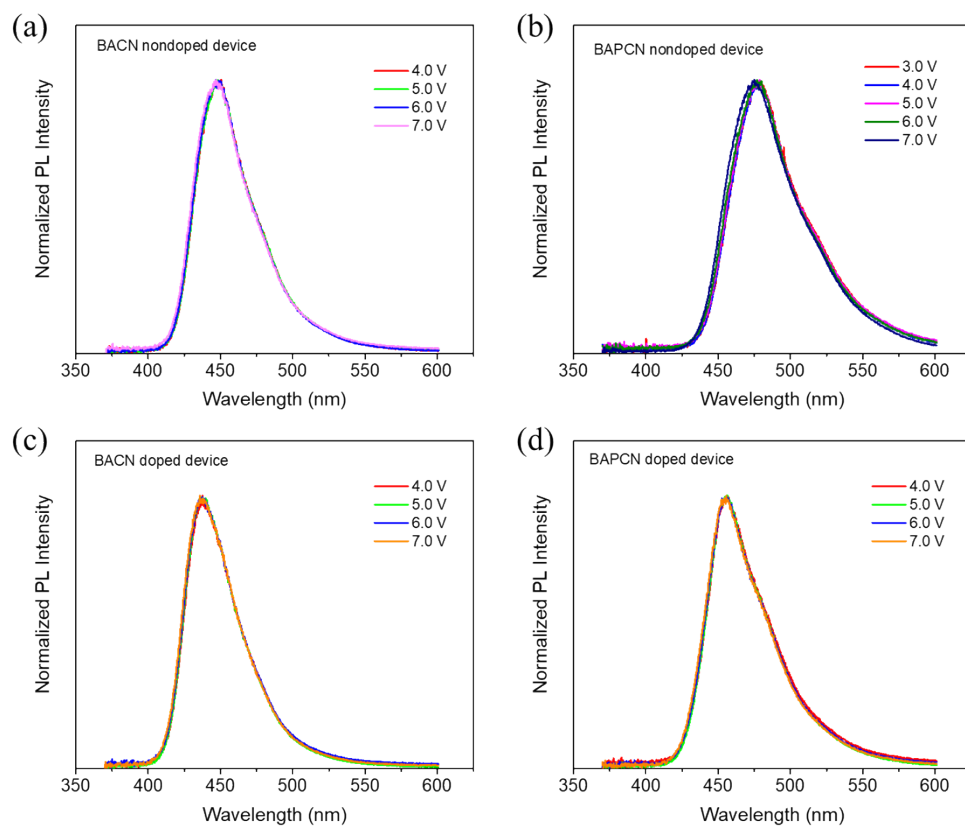

**Fig. S13.** EL spectra of BACN (a, c) and BAPCN (b, d) based devices at different voltages.

## REFERENCES

- (1) Li, W.; Pan, Y.; Xiao, R.; Peng, Q.; Zhang, S.; Ma, D.; Li, F.; Shen, F.; Wang, Y.; Yang, B.; Ma, Y. Employing ~100% Excitons in OLEDs by Utilizing a Fluorescent Molecule with Hybridized Local and Charge-Transfer Excited State. *Adv. Funct. Mater.* **2014**, *24*, 1609-1614.
- (2) Li, W.; Pan, Y.; Yao, L.; Liu, H.; Zhang, S.; Wang, C.; Shen, F.; Lu, P.; Yang, B.; Ma, Y. A Hybridized Local and Charge-Transfer Excited State for Highly Efficient Fluorescent OLEDs: Molecular Design, Spectral Character, and Full Exciton Utilization. *Adv. Opt. Mater.* **2014**, *2*, 892-901.
- (3) Wang, C.; Li, X.; Pan, Y.; Zhang, S.; Yao, L.; Bai, Q.; Li, W.; Lu, P.; Yang, B.; Su, S.; Ma, Y. Highly Efficient Nondoped Green Organic Light-Emitting Diodes with Combination of High Photoluminescence and High Exciton Utilization. *ACS Appl. Mater. Interfaces* **2016**, *8*, 3041-3049.
- (4) Liang, X.; Wang, Z.; Wang, L.; Hanif, M.; Hu, D.; Su, S.; Xie, Z.; Gao, Y.; Yang, B.; Ma, Y. Tailoring Excited State Properties and Energy Levels Arrangement via Subtle Structural Design on D- $\pi$ -A Materials. *Chinese J. Chem.* **2017**, *35*, 1559-1568.
- (5) Xu, Y.; Liang, X.; Liang, Y.; Guo, X.; Hanif, M.; Zhou, J.; Zhou, X.; Wang, C.; Yao, J.; Zhao, R.; Hu, D.; Qiao, X.; Ma, D.; Ma, Y. Efficient Deep-Blue Fluorescent OLEDs with a High Exciton Utilization Efficiency from a Fully Twisted Phenanthroimidazole-Anthracene Emitter. *ACS Appl. Mater. Interfaces* **2019**, *11*, 31139-31146.
